# Supplementary material for: Reduced graphene oxide–gold nanorod composite material stabilized in silicate sol–gel matrix for nitric oxide sensor
Source: Royal Society of Chemistry journal article supplement (doi:10.1039/c4ra04859h), 2014-07-22
Supplement: c4ra04859h1.pdf [file c4ra04859h1.pdf]

## Supporting Information

### Reduced graphene oxide–gold nanorods composite material stabilized in silicate sol–gel matrix for nitric oxide sensor

Subramaniam Jayabal, Perumal Viswanathan and Ramasamy Ramaraj\*

*School of Chemistry  
Centre for Photoelectrochemistry  
Madurai Kamaraj University  
Madurai-625021, India.*

*\*Corresponding author. Tel.: +91- 452-2459084;  
E-mail: ramarajr@yahoo.com*

### Contents

1. Fig. S1. Diffuse reflectance spectra of GC/RGO/Au–TPDT NRs at different conditions.
2. Fig. S2. SAED patterns of GC/RGO/Au–TPDT NRs.
3. Fig. S3. EDS of GC/RGO/Au–TPDT NRs.
4. Fig. S4. Cyclic voltammograms for bare GC and GC/RGO/Au–TPDT NRs.
5. Fig. S5. Cyclic voltammograms for 10  $\mu$ M NO at GC/RGO/Au–TPDT NRs modified electrode at different scan rates and the corresponding calibration plot.
6. Fig. S6. Amperometric  $i-t$  curve response time for 10 nM NO addition to RGO/Au–TPDT NRs modified electrode.

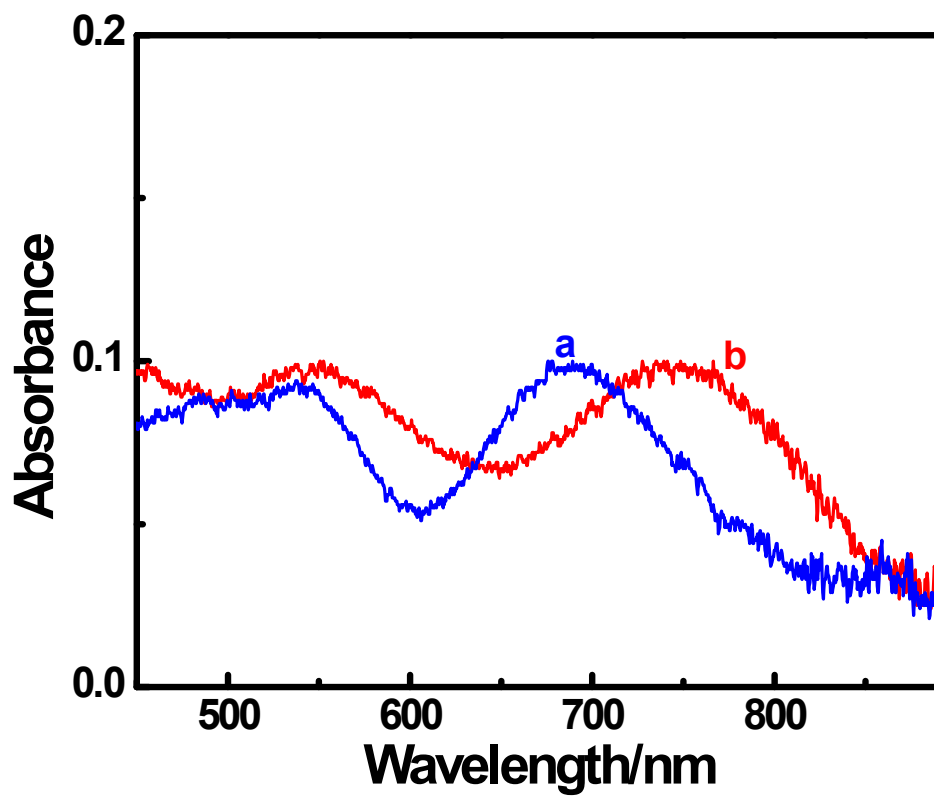

Fig. S1. Diffuse reflectance spectra of RGO/Au-TPDT NRs in wet (a) and dry (b) conditions.

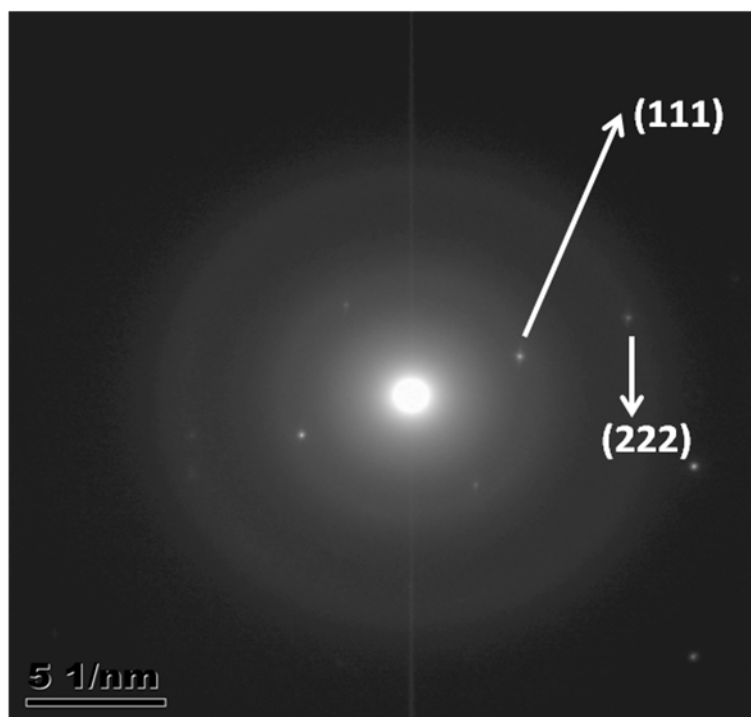

Fig. S2. SAED pattern of RGO/Au-TPDT NRs

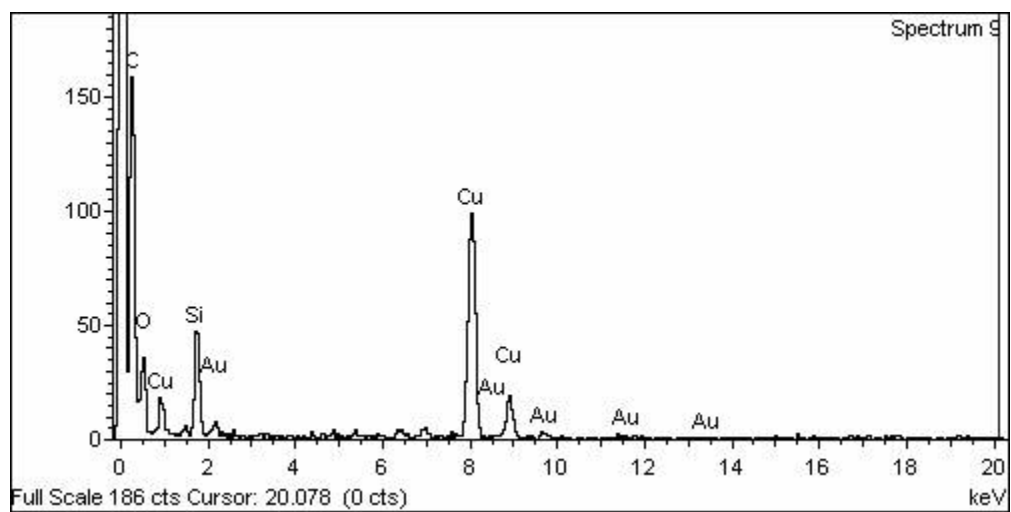

Fig. S3. EDS of RGO/Au-TPDT NRs.

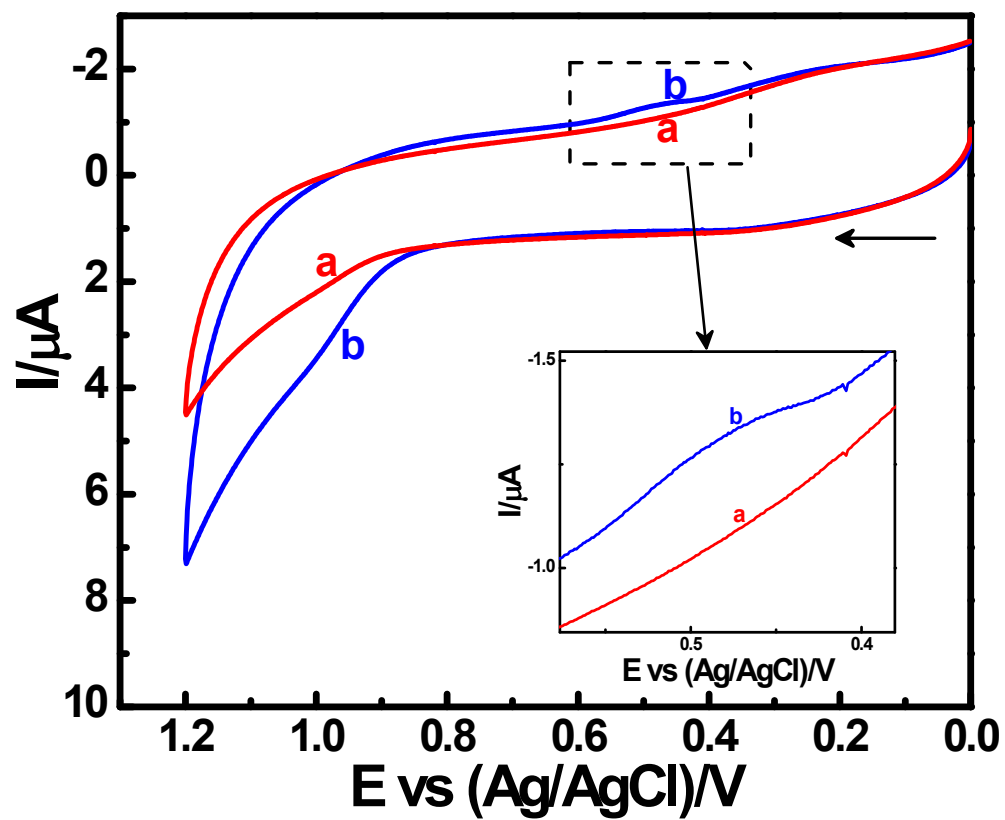

Fig. S4. Cyclic voltammograms recorded for bare GC (a) and GC/RGO/Au-TPDT NRs (b) electrodes in 0.1 M  $\text{H}_2\text{SO}_4$  at a scan rate of  $50 \text{ mV s}^{-1}$ .

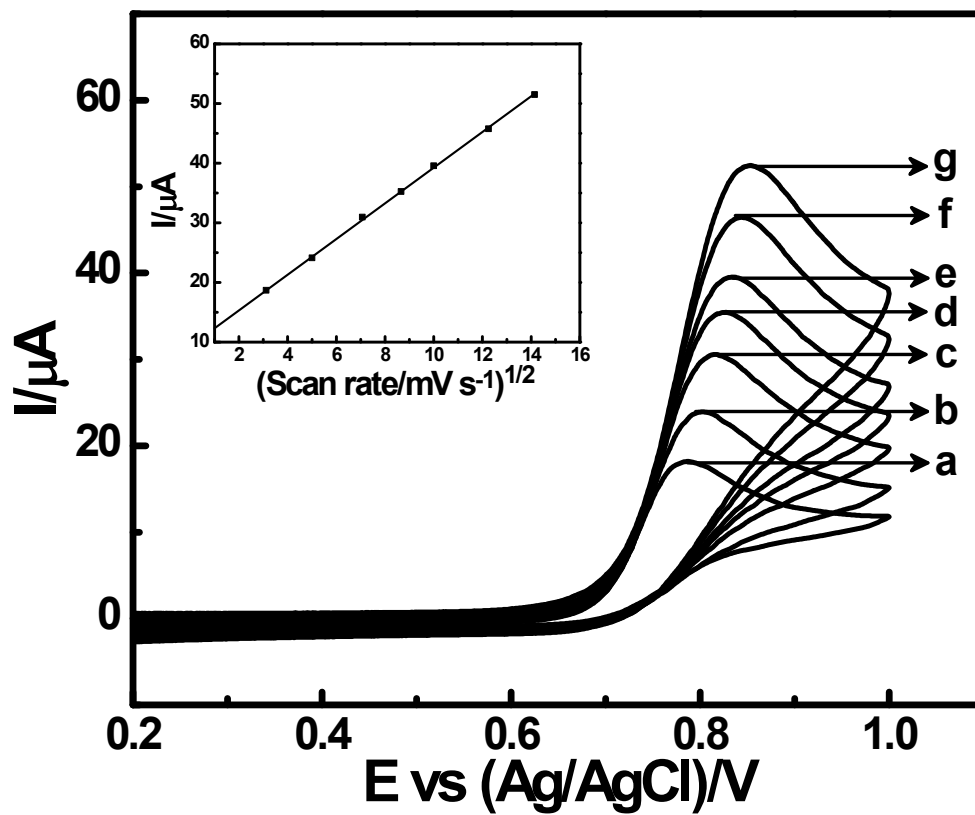

Fig. S5. Cyclic voltammograms obtained for 10  $\mu\text{M}$  NO at GC/RGO/Au-TPDT NRs modified electrode in 0.1 M PBS (pH 7.2) at different scan rates of 10 (a), 25 (b), 50 (c), 75 (d), 100 (e), 150 (f) and 200  $\text{mV s}^{-1}$  (g). Inset: Corresponding calibration plot.

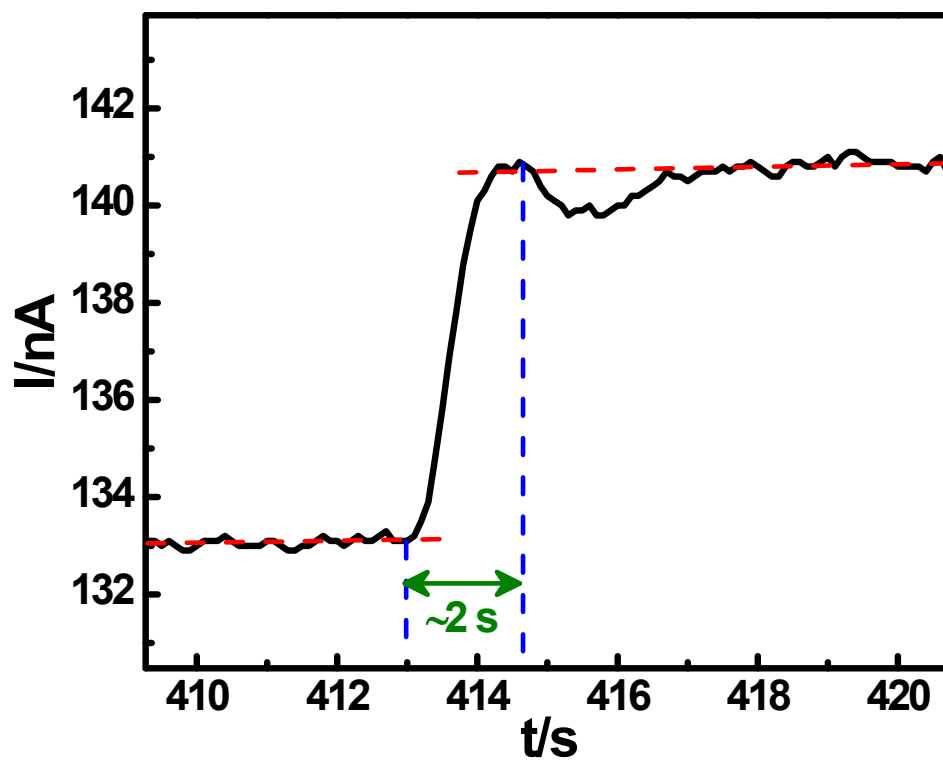

Fig. S6. Amperometric  $i-t$  curve response time for 10 nM NO addition to RGO/Au-TPDT NRs modified electrode.
